# Supplementary material
Source: HighWire-hosted journal article supplement (http://dmd.aspetjournals.org/highwire/filestream/75233/field_highwire_adjunct_files/0/DMD11_supp_data.pdf)
Supplement: DMD11_supp_data.pdf [file DMD11_supp_data.pdf]

## Supplemental Material

### **Urinary Bile Acids Profile of Cesarean Sectioned Newborns is Characterized by Oxidative Metabolism of Primary Bile Acids: Limited Roles of Fetal-specific CYP3A7 in Cholate Oxidations.**

Wen-Xia Wang<sup>1,8,#</sup>, Li Chen<sup>2,4,#</sup>, Guo-Yu Wang<sup>3,4</sup>, Jin-Ling Zhang<sup>3,4</sup>, Xian-Wen Tan<sup>1,8</sup>, Qiu-Hong Lin<sup>1,8</sup>, Yu-Jie Chen<sup>1,8</sup>, Jian Zhang<sup>1,8</sup>, Ping-Ping Zhu<sup>1,8</sup>, Jia Miao<sup>5</sup>, Ming-Ping Su<sup>6</sup>, Chang-Xiao Liu<sup>7</sup>, Wei Jia<sup>6</sup>, Ke Lan<sup>1,8,\*</sup>

<sup>1</sup> Key laboratory of Drug Targeting and Drug Delivery System, Ministry of Education, West China School of Pharmacy, Sichuan University, Chengdu, China.

<sup>2</sup> Evidence-Based Pharmacy Center, Department of Pharmacy, West China Second University Hospital, Sichuan University, Chengdu, China.

<sup>3</sup> Labor And Delivery Room, West China Second University Hospital, Sichuan University, Chengdu, China.

<sup>4</sup> Key Laboratory of Birth Defects and Related Diseases of Women and Children, Ministry of Education, Sichuan University, Chengdu, China.

<sup>5</sup> Institute of Clinical Pharmacology, West China Hospital, Sichuan University, Chengdu, China.

<sup>6</sup> Metabolomics Shared Resource, University of Hawaii Cancer Center, Honolulu, HI, United States.

<sup>7</sup> State Key Laboratory of Drug Delivery Technology and Pharmacokinetics, Tianjin Institute of Pharmaceutical Research, Tianjin, China.

<sup>8</sup> Chengdu Health-Balance Medical Technology Co., Ltd., Chengdu, China.

# These authors contributed equally to this work.

\* Corresponding to Lan K. ([lanwoco@scu.edu.cn](mailto:lanwoco@scu.edu.cn)).

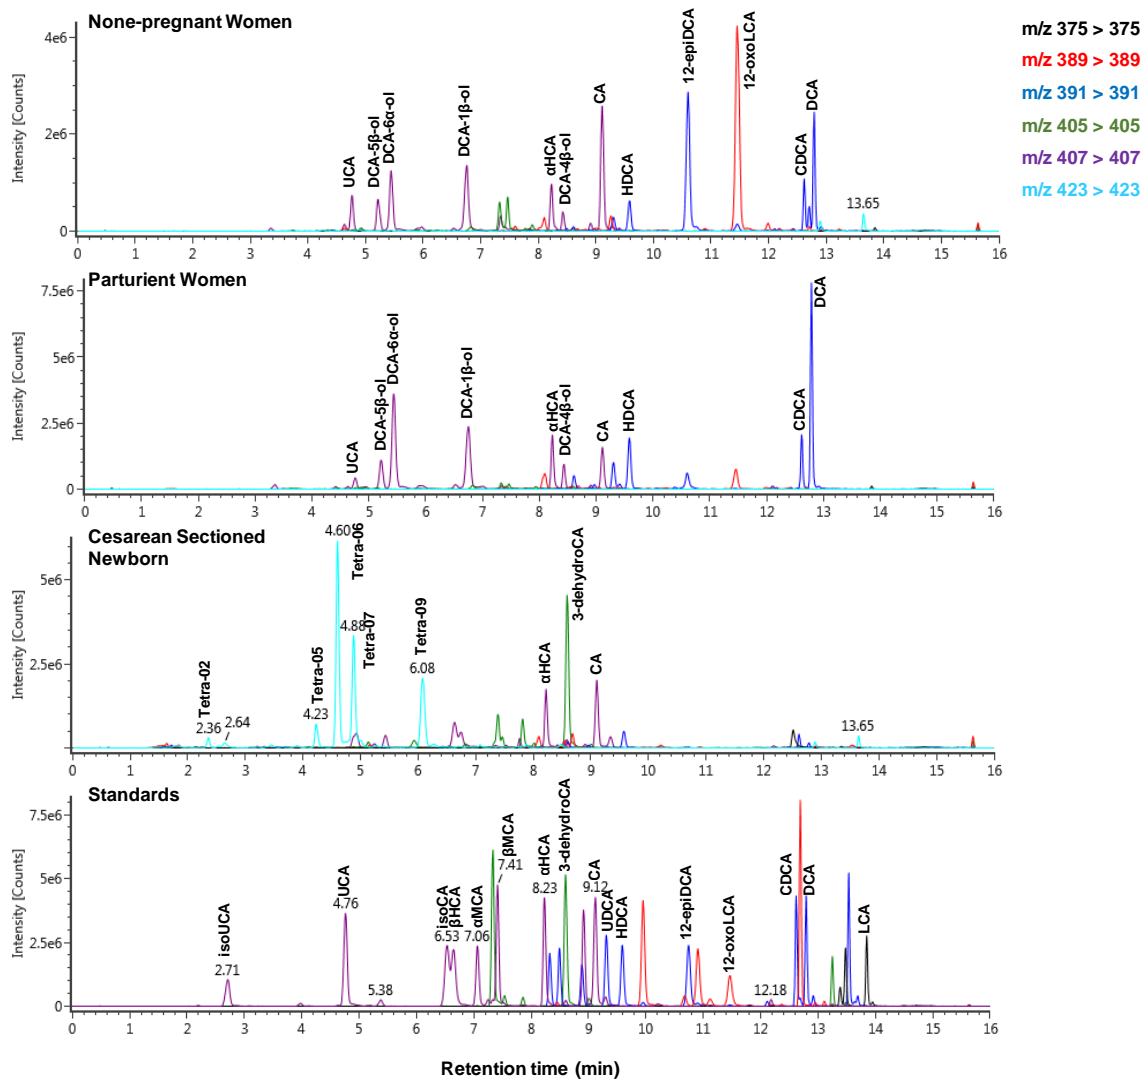

**Figure S1.** The representative ion chromatograms of the digested urine samples from a non-pregnant women, a parturient women and a cesarean sectioned newborn in comparison to that of the mixed standard samples.

**Table S1.** Donor information of human liver microsomes used in this work.

| Category | Lot No. | Gender | Age       | Race      |
|----------|---------|--------|-----------|-----------|
| Adult    | HFC205  | Female | 47 years  | Caucasian |
| Adult    | HFC208  | Female | 60 years  | Caucasian |
| Adult    | HFH617  | Female | 62 years  | Hispanic  |
| Adult    | HFH705  | Female | 42 years  | Hispanic  |
| Adult    | HG18    | Male   | 41 years  | Caucasian |
| Adult    | HG43    | Female | 23 years  | Caucasian |
| Adult    | HG43-1  | Female | 23 years  | Caucasian |
| Adult    | HG64    | Male   | 63 years  | Caucasian |
| Adult    | HH13-2  | Male   | 55 years  | Asian     |
| Adult    | HH37    | Male   | 54 years  | Caucasian |
| Adult    | HH519   | Male   | 70 years  | Caucasian |
| Adult    | HH581   | Male   | 58 years  | Caucasian |
| Adult    | HH741   | Male   | 68 years  | Caucasian |
| Adult    | HH837   | Female | 52 years  | Asian     |
| Infant   | H0845   | Male   | 1 month   | Caucasian |
| Infant   | H0671   | Male   | 3 months  | Hispanic  |
| Infant   | H0238   | Male   | 3 months  | Asian     |
| Infant   | H0825   | Male   | 11 months | Caucasian |
| Infant   | H0322   | Male   | 1 year    | Hispanic  |
| Infant   | H0551   | Male   | 2 years   | Caucasian |
| Infant   | H0852   | Male   | 2 years   | Hispanic  |
| Infant   | H0866   | Female | 3 years   | Caucasian |

**Table S2.** Demographic information of healthy man, none-pregnant healthy women and parturient pregnant women enrolled in this work.

| Population               | Healthy man | Healthy women<br>(none-pregnant) | Pregnant women<br>(parturient) |
|--------------------------|-------------|----------------------------------|--------------------------------|
| n                        | 30          | 28                               | 29                             |
| age (year)               | 26.07±4.70  | 24.46±2.07                       | 31.52±4.16                     |
| Height (m)               | 1.71±0.05   | 1.60±0.06                        | 1.58±4.81                      |
| Weight (Kg)              | 62.53±7.31  | 53.02±5.87                       | 64.48±6.68                     |
| BMI (Kg/m <sup>2</sup> ) | 21.35±2.11  | 20.59±1.61                       | 25.69±2.18                     |

Data were shown as mean±SD.

**Table S3.** Demographic information of cesarean sectioned newborns enrolled in this work.

| Case    | Gender | Birth weight (g) | Gestational age (week) | Diaper collection time after birth (hour) | Feeding patterns |
|---------|--------|------------------|------------------------|-------------------------------------------|------------------|
| 1       | Female | 3150             | 38                     | 24                                        | breast-fed       |
| 2       | Male   | 2910             | 38                     | 25                                        | breast-fed       |
| 3       | Male   | 2950             | 36                     | 24                                        | breast-fed       |
| 4       | Male   | 3150             | 38                     | 22                                        | breast-fed       |
| 5       | Male   | 3020             | 37                     | 22                                        | breast-fed       |
| 6       | Male   | 3070             | 38                     | 43                                        | breast-fed       |
| 7       | Female | 3300             | 38                     | 25                                        | breast-fed       |
| 8       | Male   | 3240             | 38                     | 5                                         | breast-fed       |
| 9       | Female | 3380             | 39                     | 23                                        | formula-fed      |
| 10      | Male   | 3102             | 38                     | 23                                        | mixed feeding    |
| 11      | male   | 3270             | 38                     | 16                                        | formula-fed      |
| 12      | Female | 3430             | 39                     | 21                                        | breast-fed       |
| 13      | Female | 2640             | 38                     | 21                                        | mixed feeding    |
| 14      | Female | 3100             | 38                     | 26                                        | breast-fed       |
| 15      | Female | 3530             | 39                     | 22                                        | breast-fed       |
| 16      | Female | 3080             | 39                     | 18                                        | mixed feeding    |
| 17      | Female | 2900             | 38                     | 25                                        | breast-fed       |
| 18      | Female | 2850             | 37                     | 20                                        | breast-fed       |
| 19      | Female | 3010             | 39                     | 41                                        | breast-fed       |
| 20      | Female | 3250             | 39                     | 20                                        | breast-fed       |
| 21      | Female | 2800             | 38                     | 22                                        | breast-fed       |
| Mean±SD |        | 3102±226         | 38±1                   | 23±8                                      |                  |

**Table S4.** Extraction recoveries of urinary BAs absorbed in diaper gel in comparison to the direct analysis of a pooled urine sample of in-lab volunteers.

| BA analytes | Extraction recovery (%)   |                                    |
|-------------|---------------------------|------------------------------------|
|             | The methanol method (n=3) | The CaCl <sub>2</sub> method (n=4) |
| LCA         | 44±7                      | 64±9                               |
| 6-oxoLCA    | 59±9                      | 86±6                               |
| 12-oxoLCA   | 38±8                      | 102±6                              |
| isoUDCA     | 41±6                      | 91±7                               |
| UDCA        | 44±7                      | 103±8                              |
| HDCA        | 35±8                      | 85±4                               |
| 12epiDCA    | 31±10                     | 83±4                               |
| CDCA        | 53±12                     | 90±6                               |
| DCA         | 49±12                     | 86±4                               |
| 7-oxoDCA    | 43±6                      | 91±4                               |
| isoUCA      | 38±16                     | 96±1                               |
| DCA-5b-ol   | 40±9                      | 100±5                              |
| DCA-6α-ol   | 40±12                     | 100±4                              |
| DCA-1β-ol   | 40±8                      | 91±3                               |
| HCA         | 41±7                      | 90±3                               |
| DCA-4β-ol   | 47±9                      | 96±8                               |
| CA          | 49±8                      | 94±4                               |

BAs were determined with the enzyme digestion method described in the article. Data were shown as mean±SD.

**Table S5.** Hill coefficients for regioselective oxidations of DCA in human liver microsomes within the substrate range of 1-300  $\mu\text{M}$ .

| Lot No. | Age       | $V_{\max}$ (pmol/min/mg protein) |                   |                   |                    |                   |           | $S_{50}$ ( $\mu\text{M}$ ) |                   |                   |                    |                   |           | $CL_{\text{int}}$ (mL/min/ $\mu\text{g}$ protein) |                   |                   |                    |                   |           |
|---------|-----------|----------------------------------|-------------------|-------------------|--------------------|-------------------|-----------|----------------------------|-------------------|-------------------|--------------------|-------------------|-----------|---------------------------------------------------|-------------------|-------------------|--------------------|-------------------|-----------|
|         |           | DCA-1 $\beta$ -ol                | DCA-4 $\beta$ -ol | DCA-5 $\beta$ -ol | DCA-6 $\alpha$ -ol | DCA-6 $\beta$ -ol | DCA-19-ol | DCA-1 $\beta$ -ol          | DCA-4 $\beta$ -ol | DCA-5 $\beta$ -ol | DCA-6 $\alpha$ -ol | DCA-6 $\beta$ -ol | DCA-19-ol | DCA-1 $\beta$ -ol                                 | DCA-4 $\beta$ -ol | DCA-5 $\beta$ -ol | DCA-6 $\alpha$ -ol | DCA-6 $\beta$ -ol | DCA-19-ol |
| HFC205  | 47 years  | 453.2                            | 6.127             | 108.7             | 81.73              | 42.21             | 4.076     | 155.8                      | 874.0             | 423.8             | 571.0              | 1422              | 208.6     | 2.909                                             | 0.007             | 0.256             | 0.143              | 0.030             | 0.020     |
| HFC208  | 60 years  | 569.0                            | 4.471             | 122.1             | 143.2              | 37.67             | 5.200     | 146.9                      | 259.6             | 276.8             | 807.5              | 716.2             | 541.7     | 3.873                                             | 0.017             | 0.441             | 0.177              | 0.053             | 0.010     |
| HFH617  | 62 years  | 209.4                            | 2.939             | 35.59             | 20.21              | 11.98             | 6.988     | 137.3                      | 133.4             | 255.9             | 215.0              | 758.8             | 91.52     | 1.525                                             | 0.022             | 0.139             | 0.094              | 0.016             | 0.076     |
| HFH705  | 42 years  | 55.23                            | 0.624             | 7.728             | 4.498              | 1.331             | ND        | 123.1                      | 356.7             | 136.4             | 179.1              | 169.4             | NA        | 0.449                                             | 0.002             | 0.057             | 0.025              | 0.008             | NA        |
| HG18    | 41 years  | 80.21                            | 1.067             | 19.62             | 20.55              | 2.643             | 0.4019    | 252.2                      | 454.8             | 705.4             | 1198               | 372.2             | 132.4     | 0.318                                             | 0.002             | 0.028             | 0.017              | 0.007             | 0.003     |
| HG43    | 23 years  | 139.1                            | 1.668             | 21.41             | 17.35              | 8.567             | ND        | 165.6                      | 488.3             | 183.6             | 349.4              | 612.9             | NA        | 0.840                                             | 0.003             | 0.117             | 0.050              | 0.014             | NA        |
| HG43-1  | 23 years  | 137.6                            | 0.766             | 22.44             | 19.10              | 6.962             | 0.4798    | 179.4                      | 183.2             | 230.5             | 437.0              | 434.1             | 106.8     | 0.767                                             | 0.004             | 0.097             | 0.044              | 0.016             | 0.004     |
| HG64    | 63 years  | 137.1                            | 3.028             | 17.11             | 16.34              | 2.024             | 14.11     | 118.7                      | 65.90             | 176.7             | 242.6              | 161.7             | 79.7      | 1.155                                             | 0.046             | 0.097             | 0.067              | 0.013             | 0.177     |
| HH13-2  | 55 years  | 36.20                            | 1.067             | 4.557             | 6.071              | ND                | 3.170     | 122.3                      | 139.1             | 176.1             | 480.5              | NA                | 88.41     | 0.296                                             | 0.008             | 0.026             | 0.013              | NA                | 0.036     |
| HH37    | 54 years  | 218.2                            | 1.857             | 39.42             | 29.51              | 7.407             | 4.616     | 113.1                      | 105.7             | 189.2             | 295.8              | 222.9             | 79.8      | 1.929                                             | 0.018             | 0.208             | 0.100              | 0.033             | 0.058     |
| HH519   | 70 years  | 345.9                            | 14.39             | 39.92             | 39.74              | 3.161             | 46.30     | 110.7                      | 132.4             | 200.0             | 196.8              | 156.0             | 111.6     | 3.125                                             | 0.109             | 0.200             | 0.202              | 0.020             | 0.415     |
| HH581   | 58 years  | 131.4                            | 1.664             | 17.42             | 14.29              | 4.464             | 1.105     | 159.9                      | 598.3             | 192.6             | 364.0              | 409.1             | 432.6     | 0.822                                             | 0.003             | 0.090             | 0.039              | 0.011             | 0.003     |
| HH741   | 68 years  | 115.6                            | 0.898             | 15.56             | 10.61              | 2.484             | 1.046     | 103.4                      | 112.8             | 132.6             | 211.2              | 122.4             | 59.32     | 1.118                                             | 0.008             | 0.117             | 0.050              | 0.020             | 0.018     |
| HH837   | 52 years  | 319.4                            | 6.308             | 53.49             | 39.80              | 11.41             | 1.860     | 127.5                      | 1960              | 228.5             | 399.0              | 474.1             | 107.6     | 2.505                                             | 0.003             | 0.234             | 0.100              | 0.024             | 0.017     |
| H0845   | 1 month   | 668.2                            | 59.0              | 96.5              | 106.8              | 25.9              | 243.3     | 96.1                       | 147.0             | 189.3             | 118.4              | 1547.0            | 129.0     | 7.0                                               | 0.40              | 0.51              | 0.90               | 0.02              | 1.89      |
| H0671   | 3 months  | 201.4                            | 9.5               | 24.4              | 24.2               | 1.9               | 46.1      | 141.7                      | 102.3             | 384.9             | 157.5              | 326.2             | 107.2     | 1.4                                               | 0.09              | 0.06              | 0.15               | 0.01              | 0.43      |
| H0238   | 3 months  | 282.7                            | 18.5              | 27.8              | 38.8               | 2.2               | 73.4      | 72.1                       | 79.9              | 87.8              | 89.3               | 72.0              | 61.3      | 3.9                                               | 0.23              | 0.32              | 0.43               | 0.03              | 1.20      |
| H0825   | 11 months | 636.4                            | 55.7              | 347.8             | 364.9              | /                 | 221.8     | 103.8                      | 316.9             | 1631.0            | 1952.0             | /                 | 253.9     | 6.1                                               | 0.18              | 0.21              | 0.19               | /                 | 0.87      |
| H0322   | 1 year    | 37.4                             | 1.7               | 3.7               | 2.9                | /                 | 4.7       | 134.7                      | 118.3             | 128.1             | 83.4               | /                 | 52.4      | 0.3                                               | 0.01              | 0.03              | 0.03               | /                 | 0.09      |
| H0551   | 2 years   | 120.8                            | 0.9               | 16.2              | 10.6               | 3.5               | 1.1       | 53.0                       | 59.9              | 52.4              | 68.3               | 63.7              | 40.8      | 2.3                                               | 0.01              | 0.31              | 0.15               | 0.06              | 0.03      |
| H0852   | 2 years   | 178.8                            | 5.1               | 36.0              | 28.1               | 3.3               | 19.2      | 160.7                      | 77.3              | 558.8             | 369.8              | 205.2             | 61.1      | 1.1                                               | 0.07              | 0.06              | 0.08               | 0.02              | 0.31      |
| H0866   | 3 years   | 379.0                            | 3.9               | 92.7              | /                  | /                 | 9.7       | 280.2                      | 92.8              | 755.2             | /                  | /                 | 43.4      | 1.4                                               | 0.04              | 0.12              | /                  | /                 | 0.22      |

**Table S6.** Retention time of tetrahydroxy-cholan-24-oic acids (Tetra-BA) detected *in vivo* (urine samples of newborns) and *in vitro* (incubation samples of CA, TCA and GCA in infant liver microsomes).

| BA metabolites | Retention time (min, mean±SD) |                 |
|----------------|-------------------------------|-----------------|
|                | <i>in vivo</i>                | <i>in vitro</i> |
| 3DHCA          | 8.594±0.009                   | 8.590±0.002     |
| Tetra01        | 1.824±0.016                   | ND              |
| Tetra02        | 2.354±0.008                   | 2.352±0.005     |
| Tetra03        | 2.648±0.011                   | 2.651±0.015     |
| Tetra04        | 3.454±0.009                   | ND              |
| Tetra05        | 4.240±0.007                   | 4.239±0.009     |
| Tetra06        | 4.603±0.008                   | ND              |
| Tetra07        | 4.883±0.008                   | 4.838±0.033     |
| Tetra08        | 5.407±0.027                   | ND              |
| Tetra09        | 6.087±0.008                   | ND              |
